# Supplementary material for: Synthesis, crystal structure and magnetic properties of the complex [ReCl3(tppz)]·MeCN
Source: Royal Society of Chemistry journal article supplement (doi:10.1039/c5ra21466a), 2015-01-01
Supplement: c5ra21466a1.pdf [file c5ra21466a1.pdf]

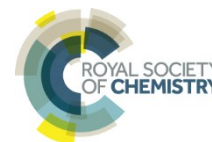

Journal Name

ARTICLE

## Electronic supplementary information (ESI)

### Synthesis, crystal structure and magnetic properties of the complex $[\text{ReCl}_3(\text{tppz})] \cdot \text{MeCN}$

J. Palion-Gazda,<sup>a</sup> I. Gryca,<sup>a</sup> B. Machura,<sup>\*a</sup> Francesc Lloret,<sup>b</sup> and Miguel Julve<sup>\*b</sup>

<sup>a</sup> Department of Crystallography, Institute of Chemistry, University of Silesia, 9th Szkolna St., 40-006 Katowice, Poland. E-mail: basia@ich.us.edu.pl

<sup>b</sup> Departament de Química Inorgànica/Instituto de Ciencia Molecular (ICMol), Facultat de Química de la Universitat de València, C/ Catedrático José Beltrán 2, 46980 Paterna, València, Spain. E-mail: miguel.julve@uv.es

#### Contents

Table S1. Selected magneto-structural data for six-coordinate rhenium(III) complexes.

Figure S1. IR spectrum of **1**.

Figure S2. The X-Ray powder diffraction pattern of compound **1** (experimental - black) and the simulation of the powder pattern of **1** from the crystal structure (red).

Figure S3. <sup>1</sup>H (a) and <sup>13</sup>C NMR (b) spectra of compound **1**.

Appendix. Energy levels for a <sup>3</sup>T<sub>1</sub> term arising from the t<sub>2</sub><sup>4</sup> electronic configuration under a tetragonal ligand-field and spin-orbit coupling.

**Table S1.** Selected magneto-structural data for six-coordinate rhenium(III) complexes<sup>a</sup>

| [ReX <sub>3</sub> L <sub>3</sub> ] <sup>b</sup> | Re–X       | Re–N      | Configuration of halide anions | Magnetic properties | Ref. |
|-------------------------------------------------|------------|-----------|--------------------------------|---------------------|------|
| [ReCl <sub>3</sub> (py) <sub>3</sub> ]          | 2.367(2)   | 2.117(8)  | <i>mer</i>                     | c                   | 14b  |
|                                                 | 2.367(2)   | 2.120(8)  |                                |                     |      |
|                                                 | 2.397(2)   | 2.116(5)  |                                |                     |      |
| [ReBr <sub>3</sub> (py) <sub>3</sub> ]          | 2.513(2)   | 2.111(10) | <i>mer</i>                     | c                   | 14b  |
|                                                 | 2.506(2)   | 2.122(10) |                                |                     |      |
|                                                 | 2.534(2)   | 2.121(9)  |                                |                     |      |
| [ReCl <sub>3</sub> (Hpz) <sub>3</sub> ]         | 2.3220(18) | 2.133(5)  | <i>mer</i>                     | 1.8 BM              | 14j  |
|                                                 | 2.3101(18) | 2.095(5)  |                                |                     |      |
|                                                 | 2.3120(18) | 2.093(5)  |                                |                     |      |
| [ReCl <sub>3</sub> (3,5-lut) <sub>3</sub> ]     | 2.356(4)   | 2.13(1)   | <i>mer</i>                     | c                   | 14d  |
|                                                 | 2.362(4)   | 2.13(1)   |                                |                     |      |
|                                                 | 2.402(4)   | 2.12(1)   |                                |                     |      |
| [ReCl <sub>3</sub> (L <sup>1</sup> Et)]         | 2.384(3)   | 2.075(9)  | <i>fac</i>                     | paramagnetic        | 14h  |
|                                                 | 2.384(3)   | 2.075(9)  |                                |                     |      |
|                                                 | 2.391(4)   | 2.154(14) |                                |                     |      |
| [ReCl <sub>3</sub> (L <sup>4</sup> Et)]         | 2.3741(17) | 2.078(6)  | <i>fac</i>                     | c                   | 14h  |
|                                                 | 2.3996(16) | 2.084(5)  |                                |                     |      |
|                                                 | 2.4040(17) | 2.209(5)  |                                |                     |      |

<sup>a</sup> Only six-coordinate Re(III) complexes with a ReN<sub>3</sub>Cl<sub>3</sub> chromophore were considered.

<sup>b</sup> Abbreviation for the ligands: py = pyridine, Hpz = pyrazole, 3,5-lut = 3,5-dimethylpyridine, L<sup>1</sup>Et = (2-C<sub>5</sub>H<sub>4</sub>NCH<sub>2</sub>)<sub>2</sub>NCH<sub>2</sub>CO<sub>2</sub>C<sub>2</sub>H<sub>5</sub>, L<sup>4</sup>Et = (2-C<sub>5</sub>H<sub>4</sub>NCH<sub>2</sub>)N(CH<sub>3</sub>C<sub>3</sub>H<sub>2</sub>N<sub>2</sub>CH<sub>2</sub>)(CH<sub>2</sub>CO<sub>2</sub>C<sub>2</sub>H<sub>5</sub>).

<sup>c</sup> Not measured.

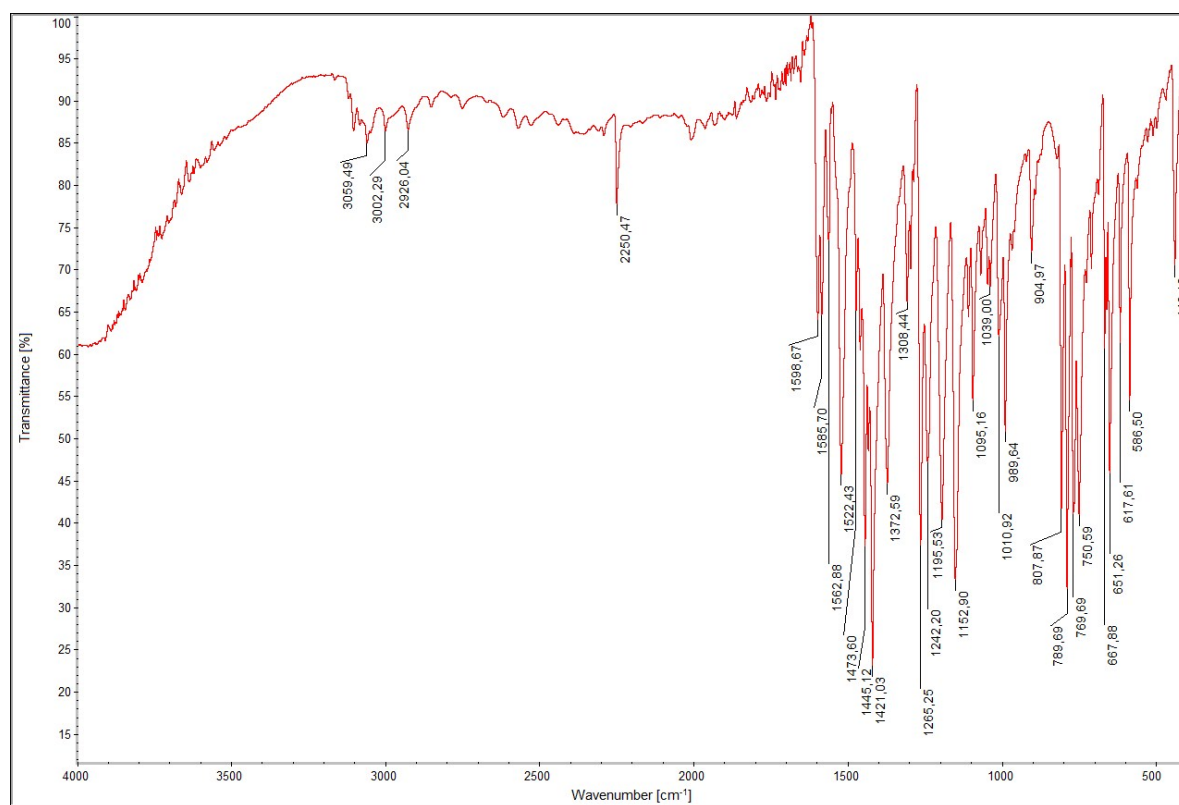

Figure S1. IR spectrum of **1**.

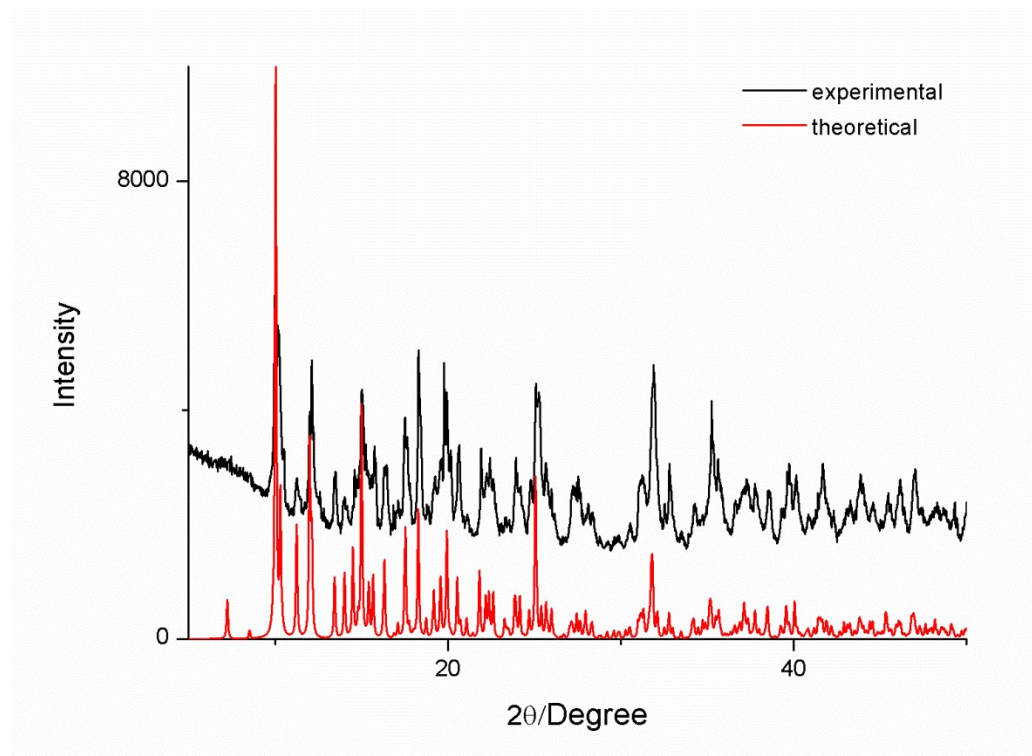

Figure S2. X-ray powder diffraction pattern of **1**: (black) experimental; (red) simulation of the powder pattern from the crystal structure.

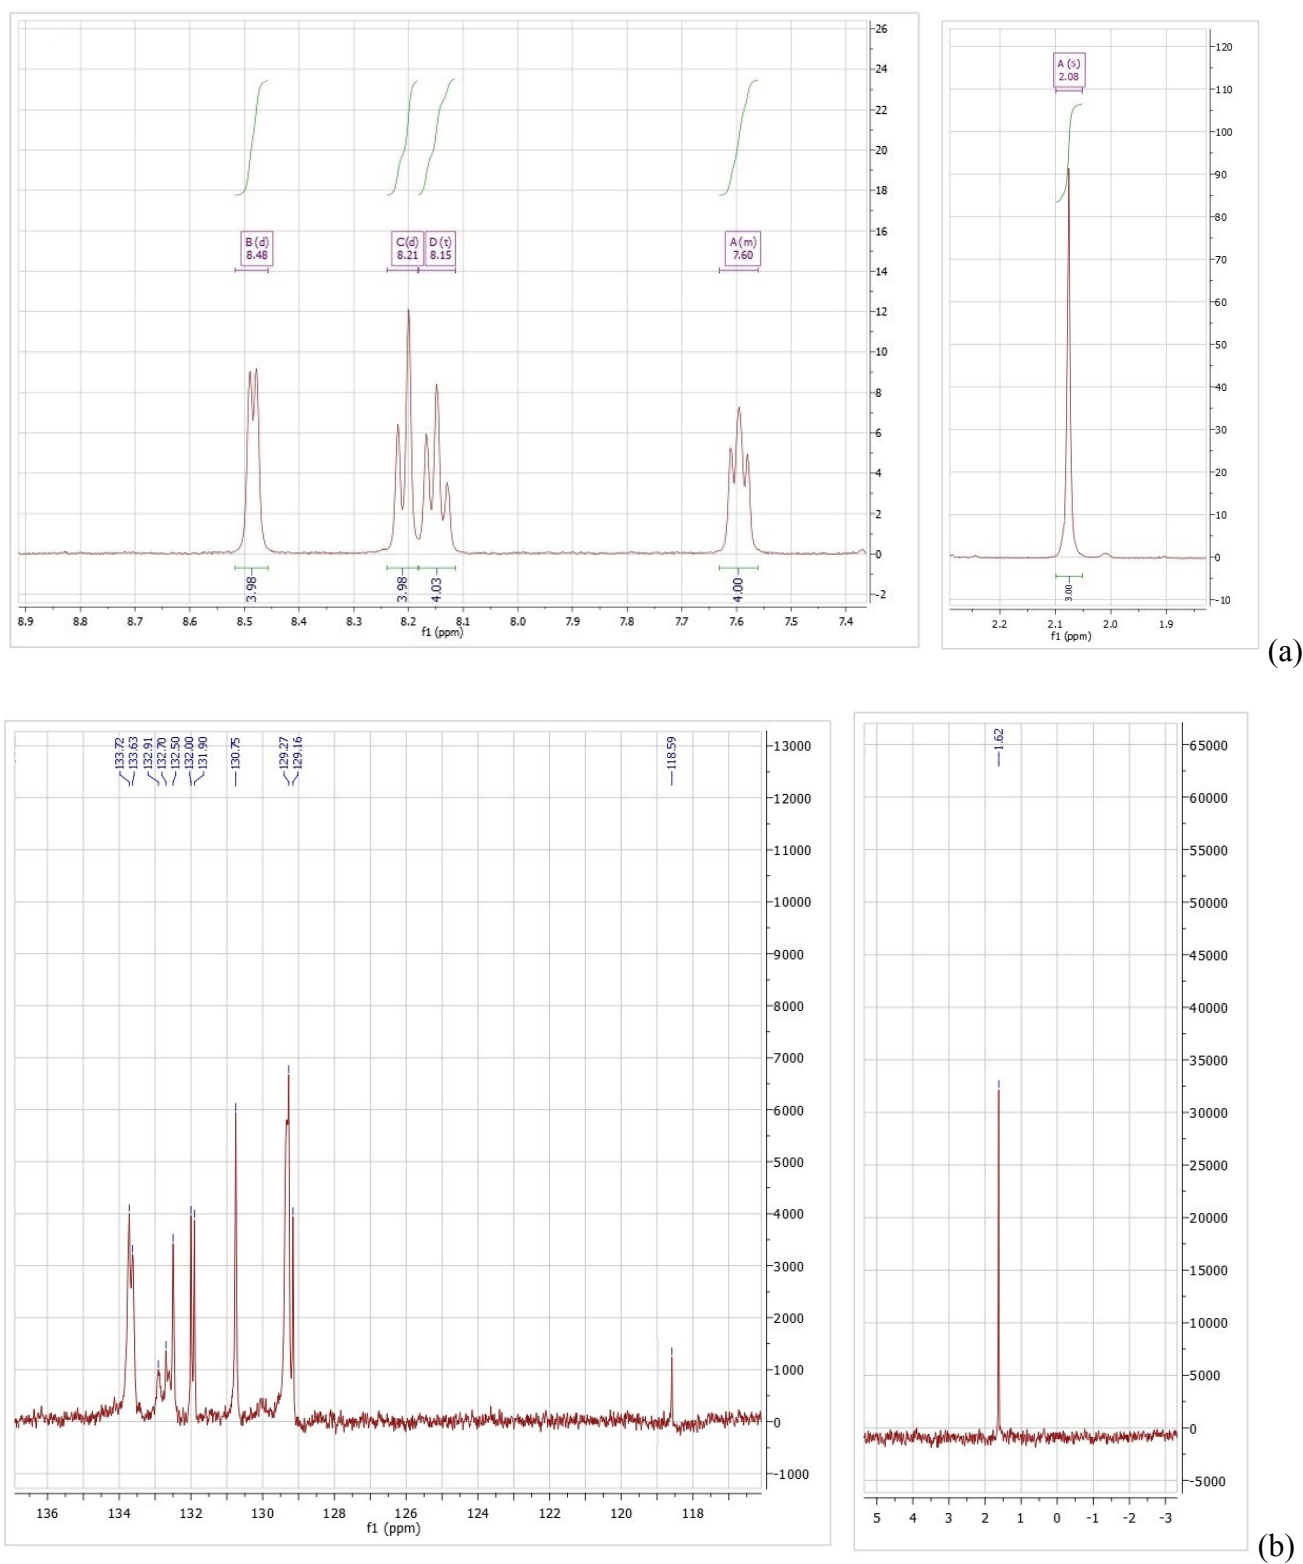

**Figure S3.**  $^1\text{H}$  (a) and  $^{13}\text{C}$  NMR (b) spectra of compound **1**.

**Appendix: Energy levels for a  ${}^3T_1$  term arising from the  $t_2^4$  electronic configuration under a tetragonal ligand-field and spin-orbit coupling**

In order to simplify the calculations, we take advantage of the isomorphism between the orbital triplet  ${}^3T_1$  coming from the  $t_2^4$  electronic configuration and the triplet  $L = 1$  from a  ${}^3P$  term ( $p^4$  electronic configuration). The matrix elements of  $L$  within the orbital triplet  $T_1$  are exactly the same than those contained in the matrix of  $(-1)L$  in the associated  $P$  state (strong ligand-field approach). So, we can use the  $||T_1|| = -\kappa ||P||$  relationship where  $\kappa$  is the orbital reduction factor due to the covalency effects.<sup>19</sup> In this respect, the wave-functions for the  ${}^3T_1$  term are written in the form of  $|M_L, M_S\rangle$  with  $M_L = 0, \pm 1$  and  $M_S = 0, \pm 1$ . The tetragonal distortion and spin-orbit coupling are treated simultaneously through the Hamiltonian of eqn (1)

$$\hat{H} = -\kappa\lambda\hat{L}\hat{S} + \Delta(\hat{L}_z^2 - 2/3) \quad (1)$$

where the first term is the spin-orbit coupling, the second one accounts for the orbital distortion of the triplet  $T_1$  [ $T_1$  breaks its degeneracy under a  $C_4$  symmetry group giving an orbital doublet ( $E$ ) and an orbital singlet ( $A_2$ ) which are separated by an energy gap ( $\Delta$ )].  $\kappa$  is the orbital reduction due to covalency.

The secular determinant relevant to the application of the Hamiltonian of eqn (1) may be arranged and factorized in the following sub-determinants:<sup>19</sup>

|                  |                                  |                                  |
|------------------|----------------------------------|----------------------------------|
|                  | $ 1, -1\rangle$                  | $ -1, 1\rangle$                  |
| $\langle 1, -1 $ | $(\Delta/3 - \kappa\lambda) - E$ | 0                                |
| $\langle -1, 1 $ | 0                                | $(\Delta/3 - \kappa\lambda) - E$ |

|                   |                                  |                  |                                  |
|-------------------|----------------------------------|------------------|----------------------------------|
|                   | $ 1, 1\rangle$                   | $ 0, 0\rangle$   | $ -1, -1\rangle$                 |
| $\langle 1, 1 $   | $(\Delta/3 + \kappa\lambda) - E$ | $-\kappa\lambda$ | 0                                |
| $\langle 0, 0 $   | $-\kappa\lambda$                 | $-2\Delta/3 - E$ | $-\kappa\lambda$                 |
| $\langle -1, -1 $ | 0                                | $-\kappa\lambda$ | $(\Delta/3 + \kappa\lambda) - E$ |

|                 |                |                  |                 |                |
|-----------------|----------------|------------------|-----------------|----------------|
|                 | $ 1, 0\rangle$ | $ 0, -1\rangle$  | $ -1, 0\rangle$ | $ 0, 1\rangle$ |
| $\langle 1, 0 $ | $\Delta/3 - E$ | $-\kappa\lambda$ | 0               | 0              |

|                   |                  |                  |                  |                  |
|-------------------|------------------|------------------|------------------|------------------|
| $\langle 0, -1  $ | $-\kappa\lambda$ | $-2\Delta/3 - E$ | 0                | 0                |
| $\langle -1, 0  $ | 0                | 0                | $\Delta/3 - E$   | $-\kappa\lambda$ |
| $\langle 0, 1  $  | 0                | 0                | $-\kappa\lambda$ | $-2\Delta/3 - E$ |

The values of the energy levels from these determinants are:

$$E_1 = E_2 = \frac{\Delta}{3} - \kappa\lambda$$

$$E_3 = E_4 = \frac{1}{2} \left[ -\frac{\Delta}{3} + (\Delta^2 + 4\kappa^2\lambda^2)^{1/2} \right]$$

$$E_5 = E_6 = \frac{1}{2} \left[ -\frac{\Delta}{3} - (\Delta^2 + 4\kappa^2\lambda^2)^{1/2} \right]$$

$$E_7 = \frac{\Delta}{3} + \kappa\lambda$$

$$E_8 = \frac{1}{2} \left[ -\frac{\Delta}{3} + \kappa\lambda + (\Delta^2 + 2\kappa\lambda\Delta + 4\kappa^2\lambda^2)^{1/2} \right]$$

$$E_9 = \frac{1}{2} \left[ -\frac{\Delta}{3} + \kappa\lambda - (\Delta^2 + 2\kappa\lambda\Delta + 4\kappa^2\lambda^2)^{1/2} \right]$$
